# Supplementary material for: An Fc-free EGFR-specific 4-1BB-agonistic Trimerbody Displays Broad Antitumor Activity in Humanized Murine Cancer Models without Toxicity
Source: Oxford University Press journal article supplement (doi:10.1158/1078-0432.ccr-20-4625), 2021-03-30
Supplement: 10780432ccr204625-sup-256256_2_supp_6998902_qqjlp1.doc [file 10780432ccr204625-sup-256256_2_supp_6998902_qqjlp1.doc]

**Supplementary Methods**

**A Fc-free EGFR-specific 4-1BB-agonistic trimerbody displays non-toxic broad anti-tumor activity in humanized murine cancer models**

Marta Compte1, Seandean L. Harwood2, Ainhoa Erce-Llamazares1,3,4, Antonio Tapia-Galisteo5, Eduardo Romero6, Irene Ferrer7,8, Eva M. Garrido-Martin7,8, Ana B. Enguita9,10, Maria C. Ochoa11, Belén Blanco3,4, Marta Oteo6, Nekane Merino12,Daniel Nehme-Álvarez3,4, Oana Hangiu3,4,Carmen Domínguez-Alonso3,4, Manuela Zonca1, Angel Ramírez-Fernández3,4, Francisco J. Blanco13, Miguel A. Morcillo6, Ines G. Muñoz14, Ignacio Melero11,8,15,16, José L. Rodriguez-Peralto8,9,10,17, Luis Paz-Ares7,8,18,19, Laura Sanz5, Luis Alvarez-Vallina2,3,4

**Expression and purification of recombinant antibodies**

HEK293 cells were transfected with the appropriated expression vectors by calcium phosphate precipitation method and selected in DCM with 500 μg/mL G418 to generate the stable cell lines 293-SAP3.28N and 293-SAP3.28N/CEGa1. Conditioned media were collected and purified using Strep-Tactin® purification system (IBA Lifesciences) using an ÄKTA Prime plus system (Cytiva). The purified antibodies were dialyzed overnight at 4 ºC against PBS + 150 mM NaCl (pH 7.0), analyzed by SDS-PAGE under reducing conditions and stored at 4 °C. Purified antibodies were tested for endotoxin levels by Pierce´s limulus amebocyte lysate (LAL) chromogenic endotoxinquantitation kit, following the manufacturer's specifications (Thermo Fisher Scientific). Endotoxin levels of purified antibody stocks were lower than 0.25 EU/ml as determined by LAL test.

**Western blotting**

Protein samples were separated under reducing conditions on 10-20% Tris-glycine gels and transferred onto nitrocellulose membranes (Thermo Fisher Scientific) and probed with anti-FLAG or anti-Strep-tagII mAbs, followed by incubation with DyLight800-conjugated goat anti-mouse (GAM) IgG. Visualization and quantitative analysis of protein bands were performed with the Odyssey® infrared imaging system (LI-COR Biosciences).

**ELISA**

The mouse (mo-), cynomolgus (cy-) and hu4-1BB-human IgG1 Fc chimera (R&D Systems, #937-4B, #9324-4B, #838-4B) (5µg/ml) or mo-, cy- and huEGFR-human IgG1 Fc chimera (R&D Systems, #1280-ER, #10366-ER, #344-ER) (5 µg/ml) were immobilized on Maxisorp ELISA plates (NUNC Brand Products) overnight at 4 ºC. After washing and blocking with 200 µl PBS + 5% BSA (Merck Life Science), 100 µl of purified protein solution were added and incubated for 1 hour at room temperature. The wells were washed for three times with PBS + 0.05% Tween-20, and 100 µl of anti-FLAG or anti-Strep-tagII mAb were added for 1 hour incubation at room temperature. The plate was washed as above described and 100 µl of HRP-conjugated GAM IgG (GAM-HRP) were added to each well. Afterwards, the plate was washed and developed using OPD (Merck Life Science). The recombinant His-tagged hu4-1BB (Sino Biological, #10014-H08H) (3 μg/mL) was immobilized overnight at 4 ºC, the wells were washed and blocked, and anti-hu4-1BB antibodies were added in triplicate at 10-fold serial dilutions to obtain an equilibrium binding curve. After 1 hour of incubation, wells were washed and incubated with HRP-conjugated goat anti-human IgG (GAH-HRP) (1:1000) or GAM-HRP (1:1000), respectively. The plate was developed with TMB (Merck Life Science), and the absorbance was measured at 450-570 nm. For competition ELISA, wells were coated overnight at 4 ºC with hu4-1BBL human IgG1 Fc chimera (Abcam, #ab217567) (5 μg/mL). The plate was washed and blocked as previously described. The recombinant His-tagged hu4-1BB (1 μg/mL) was pre-incubated for 30 minutes with increasing concentrations (0-10 μg/mL) of urelumab or 4-1BB IgG (SAP3.28 IgG), after which the mixtures were transferred in triplicate to the hu4-1BBL-coated wells and incubated for 1 hour. The wells were washed and incubated for 1 hour with Tetra-His mAb (αHis4), followed by GAM-HRP (1:1000). The plate was washed and developed with TMB. To further assess epitope binding of both anti-hu4-1BB mAbs, His-tagged hu4-1BB was immobilized on Maxisorp ELISA plates overnight at 4 ºC (3 μg/mL). After washing and blocking as described above, urelumab or 4-1BB IgG were added in triplicate for 1 hour at 10 μg/mL, a concentration which had been pre-determined to be saturating. Wells was washed and then received 1 μg/mL of the other antibody that had not been used in the previous step. After 1 hour, the plate was washed and 100 µl of GAM-HRP or GAH-HRP (1:000) were added to each well. Afterwards, the plate was washed and developed using TMB.

**Mass spectrometry**

A 2 l protein sample was desalted using ZipTip® C4 micro-columns (Merck Millipore) and eluted with 0.5 l SA (sinapinic acid, 10 mg/ml in [70:30] Acetonitrile: Trifluoroacetic acid 0.1%) matrix onto a Ground Steel massive 384 target (Bruker Daltonics). An Autoflex III MALDI-TOF/TOF spectrometer (Bruker Daltonics) was used in linear mode with the following settings: 5000-40000 Th window, linear positive mode, ion source 1: 20 kV, ion source 2: 18.5 kV, lens: 9 kV, pulsed ion extraction of 120 ns, high gating ion suppression up to 1000 Mr. Mass calibration was performed externally with protein 1 standard calibration mixture (Bruker Daltonics). Data acquisition, peak peaking and subsequent spectra analysis was performed using Flex Control 3.0 and Flex Analysis 3.0 software (Bruker Daltonics).

**Size exclusion chromatography-multiangle laser light scattering (SEC-MALS)**

Static light scattering measurements were performed at using a Superdex 200 Increase 10/300 GL column (Cytiva) attached in-line to a DAWN-HELEOS light scattering detector and an Optilab rEX differential refractive index detector (Wyatt Technology) at 25 ºC. The column has an exclusion volume of 8.6 mL, and no absorbance (no aggregated protein) was observed in any of the injections. The column was equilibrated with running buffer (PBS + 150 mM NaCl, 0.1 μm filtered) and the SEC-MALS system was calibrated with a sample of BSA at 1 g/L in the same buffer. Then 100 μL samples of each of the two trimerbodies at 1.1 g/L in the running buffer were injected into the column at a flow rate of 0.5 mL/minute. Data acquisition and analysis were performed using ASTRA software (Wyatt Technology). The reported molar mass corresponds to the center of the chromatography peaks. Based on numerous measurements on BSA samples at 1 g/L under the same or similar conditions we estimate that the experimental error in the molar mass is around 5%.

**Circular Dichroism**

Circular dichroism measurements were performed with a Jasco J-810 spectropolarimeter (JASCO). The spectra were recorded on protein samples at 0.1 g/L in PBS plus 150 mM NaCl using a 0.2 cm path length quartz cuvette at 25 C. Thermal denaturation curves from 5 to 95 ºC were recorded on the same protein samples and cuvette by increasing temperature at a rate of 1 C/minute and measuring the change in ellipticity at 210 nm (4-1BBN) or 213 nm (4-1BBN/CEGFR).

**Small-angle X-ray scattering (SAXS)**

SAXS experiments were performed at the beamline B21 of the Diamond Light Source (Didcot). The proteins were concentrated and prepared at 4 °C prior data collection. Samples of 40 μl of 4-1BBN and 4-1BBN/CEGFR at concentrations of 3 and 6 mg/ml were delivered at 4 °C via an in-line Agilent 1200 HPLC system in a Shodex Kw-403 column, using a running buffer composed by 50 mM Tris pH 7.5 + 150 mM NaCl. The continuously eluting samples were exposed for 300 s in 10 s acquisition blocks using an X-ray wavelength of 1 Å and a sample to detector (Pilatus 2M) distance of 3.9 m. The data covered a momentum transfer range of 0.032 < q < 3.695 Å−1. The frames recorded immediately before elution of the sample were subtracted from the protein scattering profiles. The Scåtter software package (www.bioisis.net) was used to analyze data, buffer-subtraction, scaling, merging, and checking possible radiation damage of the samples. The data set corresponding to 4-1BBN at 3 mg/ml could not be further analyzed due to aggregation. The Rg values were calculated with the Guinier approximation assuming that at very small angles q < 1.3/Rg. The maximum particle distribution, Dmax, and the distance distribution were calculated from the scattering pattern with GNOM, and shape estimation was carried out with DAMMIF/DAMMIN, all these programs included in the ATSAS package (1). Interactively generated PDB-based models were made for the two antibodies based in templates obtained with the program RaptorX. Real-space scattering profiles of the models were computed with the program FoXS.

**Kinetic studies using biolayer interferometry**

The interactions between pertinent antibodies and immobilized antigens were studied using biolayer interferometry on an Octet RED96 system (Fortebio). The purified antigens, hu4-1BB and huEGFR (R&D), were immobilized onto AR2G biosensors using standard amine reactive chemistry. Briefly, biosensors were activated with EDC and s-NHS, and then incubated for 30 min in a solution of 5 µg/mL antigen in a 10 mM acetate buffer at pH 5.0, followed by quenching with ethanolamine. All binding studies were performed using kinetics buffer (PBS + 0.1% BSA + 0.05% Tween20). To study the interactions of 4-1BBN and 4-1BBN/CEGFR with hu4-1BB, 1 and 5 nM of antibody were incubated with hu4-1BB-immobilized biosensors for two hours, after which time dissociation was measured in kinetics buffer for two hours. For the interactions of 4-1BBN/CEGFR and ATTACK antibody with huEGFR-immobilized biosensors, the same antibody concentrations and time lengths were used. Tandem binding of 4-1BBN and 4-1BBN/CEGFR to immobilized hu4-1BB and huEGFR in solution was studied by allowing 5 nM of either antibody, or just kinetics buffer, to associate with duplicate hu4-1BB-immobilized biosensors for one hour, followed by one hour’s dissociation. One duplicate biosensor was then introduced to 10 nM of huEGFR in kinetics buffer, while the other was maintained in kinetics buffer. After one hour of secondary association, secondary dissociation was measured for an hour.

***In vitro* 4-1BB-dependent NF-B activation assay**

4-1BB-dependent activation of activated nuclear factor kappa-B (NF-κB) assay was performed on thaw-and-use (T&U) GloResponseTMNFkB-*luc2*/4-1BB Jurkat cells (Promega, #JA2351) according to the manufacturer's instructions. To perform the overall assays, 1 x 105 Jurkat cells/well were plated in Assay Buffer (RPMI + 1% FCS) in white-walled 96-well plate (Merck Life Science). The anti-4-1BB agonists and control antibodies were added at ten-fold serial dilutions. Human EGFR-negative (3T3) or EGFR-positive cells (3T3huEGFR), and CHO-K1 (CHO) or CHO-K1 cells expressing human FcγRIIb (CHOhuFcγRIIb) (2 x 104 cells/ well) were added and Jurkat4-1BB cells were stimulated for 6 hours at 37 °C. Bio-Glo™ Luciferase Assay Reagent (Promega) was added and luciferase activity was assessed using a Tecan Infinite F200 plate-reading luminometer (Tecan Trading AG). The experiments were performed in triplicates and data are reported as x-fold of induction relative to the values obtained from unstimulated cells (mean ± SD). Data was analyzed and plotted using GraphPad Prism fitting software 6.01.

**Inhibition of EGFR-mediated cell proliferation and signaling**

A431 cells were seeded in DCM in 96-well plates. After 24 hours, medium was replaced by DMEM + 1% FCS containing equimolar concentrations (0.19–50 nM) of cetuximab, rituximab, 4-1BBN/CEGFR or 4-1BB IgG, and incubated for 72 hours. Viability was assessed using the CellTiter-Glo luminescent assay (Promega,#G7570). Experiments were performed in triplicate. For EGFR signaling studies, A431 cells were starved overnight in DMEM 1% FCS, and then incubated for 4 hours in serum-free DMEM in presence of 0.1 µM cetuximab, rituximab, 4-1BBN/CEGFR or 4-1BB IgG, followed by incubation with 25 ng/mL of human EGF (MiltenyiBiotec GmbH, #130-097-749) for 10 min. Samples were separated under reducing conditions on 12% Tris-glycine gels, transferred to nitrocellulose membranes, blocked and incubated with the rabbit anti-human phosphor-EGFR (Tyr1068) mAb followed by incubation with an IRDye800-donkey anti-rabbit antibody. Simultaneously, anti-β-actin mouse mAb was added as a loading control, followed by IRDye700-donkey anti-mouse IgG. Visualization and quantitative analysis of protein bands were carried out with the Odyssey system.

**Isolation of human PBMCs and T cells**

Cells from healthy donors were isolated from small leukoreduction chamber (LRS chamber) recovered after an apheresis procedure (2). The LRS chamber content was allowed to flow in a sterile tube, rinsed with up to 50 ml of PBS and huPBMCs were isolated by density gradient centrifugation using Ficoll-Paque (Cytiva Life Sciences) (2000 rpm, 20 minutes at room temperature). Residual red blood cells (RBCs) were removed adding ACK lysis buffer (Life Technologies) and huPBMCs were washed, counted and resuspended to the final desired concentration. Human T cells were then purified using the Pan T cell isolation kit (human) (Milteny Biotech, #130-096-535) following the manufacturer’s instructions. Cells were washed, counted and resuspended to the final desired concentration.

**Flow cytometry**

Cells expressing hu4-1BB (2.5 x 105 cells/well) were incubated for 1 hour on ice with purified antibodies (3 μg/ml), washed and incubated for 30 minutes with anti-FLAG mAb on ice and detected with a PE-conjugated F(ab’)2 GAM IgG antibody. The purified anti-hu4-1BB IgG1 mAb (clone SAP3.28), kindly provided by M. Glennie (University of Southampton, UK), was used as control. To study the expression of human FcRIIb cells were incubated with anti-huCD32 mAb, and PE-GAM-F(ab’)2. The cell surface expression of huEGFR and huPD-L1 was analyzed on 3T3, 3T3hEGFR, and MDA-MB-231 cells, after incubation with PE-conjugated anti-huEGFR and APC-conjugated anti-huPD-L1 mAb. Samples were analyzed with a MACSQuant Analyzer 10 flow cytometer (Miltenyi Biotec GmbH). A minimum of 20,000 events were acquired for each sample and data were evaluated using FCS Express V3 software (De Novo Software, Glendale, CA, USA).

**Serum stability**

Purified 4-1BBN and 4-1BBN/CEGFR were incubated in 60% human serum at 37 °C, for 4 days. Samples were frozen at -80 °C at different time points until the end of the experiment and were analyzed for binding activity to hu4-1BB and huEGFR by ELISA (as described above). The binding activity of the sample at 0 hours was set as 100% in order to calculate the time corresponding to percentage decay in binding activity.

**Conjugation and89Zr labeling of 4-1BBN/CEGFR**

The 4-1BBN/CEGFR (1mg) was conjugated with p-SCN-Bn-Deferoxamine (Macrocyclics) using a method previously reported (3). Zirconium-89 (89Zr) (T1/2 = 78.4 hours, β+ = 22.6%; ∼2.7 GBq/ml supplied in 1 M oxalic acid) was obtained from BV Cyclotron VU. Radiolabeling of Df-4-1BBN/CEGFR with89Zr was accomplished using traditional methods previously described and purified with PD-10 columns (Life Technologies) (3). Radiolabeling yield (RCY) was determined as % activity recovered in the collected fractions respectively of total activity used, correcting measures for decay for the elapsed time. The determination of the 89Zr activity was carried out with a dose calibrator VDC- 405 (Veenstra Instruments) using conversion factor (or dial setting factor) reported recently (4). Radiochemical purity (RQP), defined as the % of the activity of the radionuclide present in the desired radiopharmaceutical form of the total radioactivity, was analyzed by Instant Thin Layer Chromatography (ITLC). The experiments were performed in triplicate.

**Pharmacokinetic study**

Six week-old female athymic nude mice were i.v. injected (tail vein) with 242.35 kBq (14 μg) of 89Zr-labeled 4-1BBN/CEGFR in PBS. For pharmacokinetic study, blood samples collected in heparinized tubes and centrifuged at 3000 rpm for 10 minutes to obtain plasma. Plasma concentrations of radioactivity were calculated as the percent injected dose per mL (%ID/mL) and were plotted versus the time post-injection. The plasma concentration of radioactivity versus time was analyzed by a compartmental method using non-linear regression (5). The initial estimates of the pharmacokinetic parameters were computed using the curve stripping technique by the add-in program PKSolver (6). The Akaike information criterion (AIC) was used to determine the best-fit compartment model. Blood clearance (Clblood) was estimated from plasma clearance (Clplasma) using the following relation: Clblood= Clplasma/BP, where *BP* is the blood-to-plasma ratio.

**Immunohistochemistry**

Immunohistochemistry staining was performed on 4-m-thick sections of formalin-fixed, paraffin-embedded samples. Slides were incubated with mouse mAbs listed in Table S1 on a BondTM Automated System (Leica Microsystems) according to the manufacturer’s instructions. Nuclei were counter stained with Harris’ hematoxylin.

**Reference list**

1. Petoukhov MV, Franke D, Shkumatov AV, Tria G, Kikhney AG, Gajda M*, et al.* New developments in the ATSAS program package for small-angle scattering data analysis. J Appl Crystallogr 2012;45:342-50.
2. Neron S, Thibault L, Dussault N, Cote G, Ducas E, Pineault N*, et al.* Characterization of mononuclear cells remaining in the leukoreduction system chambers of apheresis instruments after routine platelet collection: a new source of viable human blood cells. Transfusion 2007;47:1042-9.
3. Vosjan MJ, Perk LR, Visser GW, Budde M, Jurek P, Kiefer GE*, et al.* Conjugation and radiolabeling of monoclonal antibodies with zirconium-89 for PET imaging using the bifunctional chelate p-isothiocyanatobenzyl-desferrioxamine. Nat Protoc 2010;5:739-43.
4. Garcia-Torano E, Romero ES, Ortega AM. Determination of activity meter settings for the PET nuclides (44)Sc and (89)Zr. Appl Radiat Isot 2019;153:108829.
5. Brown AM. A step-by-step guide to non-linear regression analysis of experimental data using a Microsoft Excel spreadsheet. Comput Methods Programs Biomed 2001;65:191-200.
6. Zhang Y, Huo M, Zhou J, Xie S. PKSolver: An add-in program for pharmacokinetic and pharmacodynamic data analysis in Microsoft Excel. Comput Methods Programs Biomed 2010;99:306-14.
