# Supplementary material for: An Fc-free EGFR-specific 4-1BB-agonistic Trimerbody Displays Broad Antitumor Activity in Humanized Murine Cancer Models without Toxicity
Source: Oxford University Press journal article supplement (doi:10.1158/1078-0432.ccr-20-4625), 2021-03-30
Supplement: 10780432ccr204625-sup-256256_2_supp_6998934_qq7lp2.doc [file 10780432ccr204625-sup-256256_2_supp_6998934_qq7lp2.doc]

**Supplementary Table 6. Pharmacokinetic parameters.** Main [89Zr]Zr-Df-4-1BBN/CEGFR trimerbody pharmacokinetic parameters estimated using a 2-compartment model (equation: C(t)=A·e(-α·t)+B·e(-β·t)).

| **Parameter** | **Value** |
| --- | --- |
| A (%ID/ml) | 3.19 |
| B (%ID/ml) | 0.72 |
| α (h-1) | 0.095 |
| β (h-1) | 0.010 |
| AUC (%ID.h/ml) | 103 |
| t1/2 α (h) | 7.3 |
| t1/2 β (h) | 66.8 |
| Cl (ml/h) | 0.97 |
| VSS (ml) | 66.5 |
