# Supplementary material for: An Fc-free EGFR-specific 4-1BB-agonistic Trimerbody Displays Broad Antitumor Activity in Humanized Murine Cancer Models without Toxicity
Source: Oxford University Press journal article supplement (doi:10.1158/1078-0432.ccr-20-4625), 2021-03-30
Supplement: 10780432ccr204625-sup-256256_2_supp_6998935_qq1lp2.doc [file 10780432ccr204625-sup-256256_2_supp_6998935_qq1lp2.doc]

**Supplementary Table 5. Kinetic constants** derived from fitting of a 1:1 interaction mode to the experimental sensorgrams shown in Figure 1.

| **Antigen** | **Antibody** | ***KD*** | ***ka(M-1s-1)*** | ***Kd(s-1)*** |
| --- | --- | --- | --- | --- |
| hu4-1BB | 4-1BBN | 5.66 x 10-11 | 4.53 x 105 | 2.56 x 10-5 |
| 4-1BBN/CEGFR | 8.02 x 10-11 | 5.74 x 105 | 4.60 x 10-5 |
| huEGFR | ATTACK | 3.16 x 10-12 | 2.85 x 106 | 9.01 x 10-6 |
| 4-1BBN/CEGFR | 1.23 x 10-11 | 1.49 x 106 | 1.83 x 10-5 |
