# Supplementary material for: An Fc-free EGFR-specific 4-1BB-agonistic Trimerbody Displays Broad Antitumor Activity in Humanized Murine Cancer Models without Toxicity
Source: Oxford University Press journal article supplement (doi:10.1158/1078-0432.ccr-20-4625), 2021-03-30
Supplement: 10780432ccr204625-sup-256256_2_supp_6998936_qqklp2.doc [file 10780432ccr204625-sup-256256_2_supp_6998936_qqklp2.doc]

**Supplementary Table 4. SAXS Data Collection and derived parameters**

| **Data collection parameters** | | |
| --- | --- | --- |
| Instrument | Diamond Light Source beamline B21 (Harwell Campus, UK) | |
| Wavelength (Å) | 1 | |
| q-range (Å-1) | 0.003–0.4 | |
| Exposure time (s) | 300 | |
| Concentration (mg ml-1) | 6 | |
| Temperature (K) | 277 | |
| **Structural parameters** | | |
| Protein | 4-1BBN | 4-1BBN/CEGFR |
| Rg (Å) (from Guinier) | 45±0.3 | 55±0.1 |
| Rg (Å) (from P(r)) | 46±0.1 | 55±0.1 |
| Dmax (Å) | 153±0.2 | 177±0.5 |
| Molecular mass determination | | |
| MM (kDa) from Porod volume | 126 | 191 |
| Calculated MM (kDa) from sequence | 111 | 160 |
| **Software employed** | | |
| Data processing | 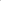Scåtter/PRIMUS/ GNOM | |
| *Ab initio* analysis / Averaging | 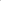DAMMIF, DAMMIN/DAMAVER | |
| Computation of model intensities | FoXS  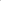 | |
| 3D graphics representations | PyMOL | |
